# Supplementary material for: Molecular hydrogen: a preventive and therapeutic medical gas for various diseases
Source: PubMed Central journal article supplement (PMC5731988; doi:10.18632/oncotarget.21130), 2017-09-21
Supplement: oncotarget-08-102653-s001.pdf [file oncotarget-08-102653-s001.pdf]

## **Molecular hydrogen: a preventive and therapeutic medical gas for various diseases**

### **SUPPLEMENTARY MATERIALS**

**Supplementary Table 1: H<sub>2</sub> therapy-relevant disease models and human diseases.**  
See Supplementary\_Table\_1
